# Supplementary material
Source: PubMed Central journal article supplement (PMC10239788)
Supplement: NIHMS1849528-supplement-1.pdf [file NIHMS1849528-supplement-1.pdf]

**Supplementary Table 1.** HEAL-EEG study sites.

| <b>Study Site</b>                                                        | <b>Number of HEAL-EEG<br/>Enrolled and Included<br/>N=150</b> |
|--------------------------------------------------------------------------|---------------------------------------------------------------|
| Benioff Children’s Hospital; University of California, San Francisco     | 27                                                            |
| Children’s Hospital Philadelphia; University of Pennsylvania             | 20                                                            |
| Children’s National Medical Center; George Washington University         | 12                                                            |
| Lucile Packard Children’s Hospital; Stanford University                  | 37                                                            |
| Nationwide Children’s Hospital; Ohio State University                    | 35                                                            |
| Riley Hospital for Children; Indiana University                          | 11                                                            |
| The Children’s Hospital of San Antonio and Methodist Children’s Hospital | 8                                                             |

**Supplementary Table 2.** Demographics and clinical characteristics of neonates at the HEAL-EEG study sites (included in the EEG study or not) and non-HEAL-EEG study sites.

| Characteristic                                     | HEAL-EEG Study Site |              | HEAL (not EEG Study Site) |
|----------------------------------------------------|---------------------|--------------|---------------------------|
|                                                    | Included            | Not Included |                           |
|                                                    | 150                 | 85           | 265                       |
| <b>Maternal Characteristics, n (%)</b>             |                     |              |                           |
| Race                                               |                     |              |                           |
| White                                              | 104 (69%)           | 58 (68%)     | 194 (73%)                 |
| Black                                              | 18 (12%)            | 17 (20%)     | 31 (12%)                  |
| Asian                                              | 15 (10%)            | 4 (4.7%)     | 14 (5.3%)                 |
| Other                                              | 13 (8.7%)           | 6 (7.1%)     | 26 (9.8%)                 |
| Hispanic ethnicity                                 | 33 (22%)            | 20 (24%)     | 69 (26%)                  |
| Age (years), mean (SD)                             | 30.1 (6.6)          | 29.9 (6.5)   | 29.3 (6.1)                |
| Education, high school or less                     | 58 (39%)            | 19 (22%)     | 108 (41%)                 |
| Parity = 1 (including subject)                     | 91 (61%)            | 49 (58%)     | 146 (55%)                 |
|                                                    |                     |              |                           |
| <b>Pregnancy and Delivery Complications, n (%)</b> |                     |              |                           |
| Maternal chorioamnionitis or fever                 | 28 (19%)            | 18 (21%)     | 31 (12%)                  |
| Maternal pre-eclampsia or eclampsia                | 16 (11%)            | 7 (8.2%)     | 22 (8.3%)                 |
| Gestational diabetes                               | 14 (9.3%)           | 12 (14%)     | 32 (12%)                  |
| Maternal obesity (BMI >30)                         | 25 (17%)            | 7 (8.2%)     | 57 (22%)                  |
| Sentinel event                                     | 48 (32%)            | 25 (29%)     | 70 (26%)                  |
| Cesarean section delivery                          | 99 (66%)            | 49 (58%)     | 181 (68%)                 |
|                                                    |                     |              |                           |
| <b>Infant Characteristics</b>                      |                     |              |                           |
| Female, n (%)                                      | 65 (43%)            | 33 (39%)     | 127 (48%)                 |
| Birth weight (grams), mean (SD)                    | 3411 (558)          | 3376 (570)   | 3349 (621)                |
| Gestational age (weeks), mean (SD)                 | 39.2 (1.5)          | 39.1 (1.4)   | 39.1 (1.5)                |
| 5-minute Apgar score, median (IQR)                 | 3 (2, 4)            | 3 (2, 5)     | 3 (2, 5)                  |
| Lowest pH <sup>‡</sup> , mean (SD)                 | 6.94 (0.18)         | 6.93 (0.17)  | 6.92 (0.17)               |
| Worst base deficit <sup>§</sup> , mean (SD)        | 17.6 (6.1)          | 18.7 (6.0)   | 18.6 (6.3)                |
| Severe encephalopathy, n (%)                       | 33 (22%)            | 20 (24%)     | 60 (23%)                  |

\*Sentinel event = placental abruption, shoulder dystocia, uterine rupture or prolapsed cord.

§ Worst pH and base deficit among cord arterial, cord venous, and arterial blood gas samples taken before 60 minutes of age.

|| Severe encephalopathy as defined by Sarnat.
